# Supplementary material for: TLR and NLRP3 inflammasome-dependent innate immune responses to tumor-derived autophagosomes (DRibbles)
Source: PubMed Central journal article supplement (PMC5108312; doi:10.1038/cddis.2016.206), 2016-08-04
Supplement: cddis2016206x1.pdf [file cddis2016206x1.pdf]

## Supplementary Figure 1 Preparation of CMV pp65 antigen specific T cell.

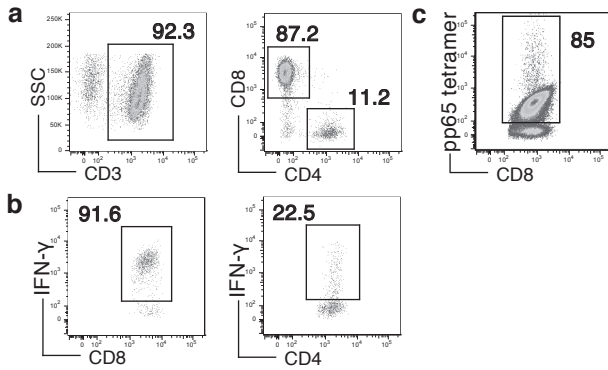

### Supplementary Figure 1 Preparation of CMV pp65 antigen specific T cell.

(a) T cells were expanded from PBMCs by priming with pp65 peptides in the presence of human IL-2 (1000 U/ml) for 10–12 days. The cellular phenotype was tested by FACS. (b) Expanded T cells were re-stimulated by pp65 peptides and intracellular IFN- $\gamma$  was measured by ICS. (c) A high percentage of pp65 antigen-specific CD8<sup>+</sup>T cells were obtained, as measured by ICS of pp65 tetramer.
