# Supplementary material for: TLR and NLRP3 inflammasome-dependent innate immune responses to tumor-derived autophagosomes (DRibbles)
Source: PubMed Central journal article supplement (PMC5108312; doi:10.1038/cddis.2016.206), 2016-08-04
Supplement: cddis2016206x2.pdf [file cddis2016206x2.pdf]

**Supplementary Figure 2 Block HSP90 in APC and DRibbles both down regulate antigen specific T cell response.**

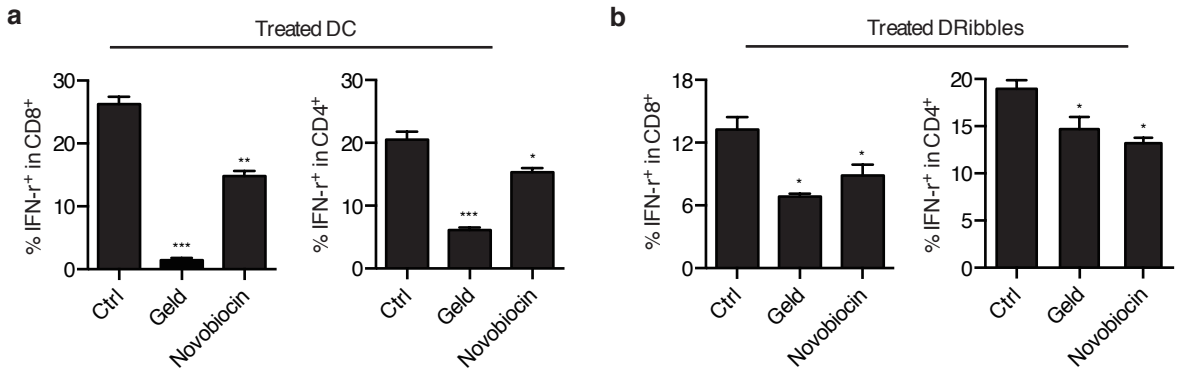

**Supplementary Figure 2 Block HSP90 in APC and DRibbles both down regulate antigen specific T cell response.**

(a) GM-CSF/IL-4 derived DC was pre-treated with GA and Novobiocin for 30 min, the frequency of IFN- $\gamma$ <sup>+</sup> T cells was detected by ICS after UbiLT3 pp65 DRibbles (30  $\mu$ g/ml) loaded DC were incubated with expanded T cells. (b) UbiLT3 pp65 DRibbles incubated with GA and Novobiocin for 30 min, the extra inhibitors were washed by PBS. The frequency of IFN- $\gamma$ <sup>+</sup> T cells was detected by ICS after UbiLT3 pp65 DRibbles (30  $\mu$ g/ml) loaded DC were incubated with expanded T cells. FACS data were analyzed by Flowjo.
